# Supplementary material for: The Molecular and Functional Characterization of Sensory Neuron Membrane Protein 1b (SNMP1b) from Cyrtotrachelus buqueti (Coleoptera: Curculionidae)
Source: MDPI journal article supplement (doi:10.3390/insects15020111), 2024-02-04
Supplement: s1 [file s1]

**Table S1.** Primer sequences used in this study.

| Primer name                                     | Sequences (5'-3')                                            |
|-------------------------------------------------|--------------------------------------------------------------|
| qPCR Primers for qPCR                           |                                                              |
| qSNMP1b-F                                       | ACCGATATTCGCCACATTAC                                         |
| qSNMP1b-R                                       | ATTGTCTGGATCAAGACCCTC                                        |
| qGAPDH-F                                        | CGCTTCTGGTAACATTATCCCAT                                      |
| qGAPDH-R                                        | TCGACAACGGAAACATCGAC                                         |
| Primers for prokaryotic expression <sup>a</sup> |                                                              |
| SNMP1b-F                                        | GTGGACAGCAAATGGGTCGC <b>GATCC</b> ATGAGAATAGGCATTCGTGACCAAG  |
| SNMP1b-R                                        | CAGTGGTGGTGGTGGTGGT <b>GCTCGAG</b> TTAGAAAATCAACTGGAGTTTCCTC |

<sup>a</sup> The sites for restriction digest in primers for prokaryotic expression are indicated in bold.
